# Supplementary material for: Microvascular Outcomes in Patients with Type 2 Diabetes Treated with Vildagliptin vs. Sulfonylurea: A Retrospective Study Using German Electronic Medical Records
Source: Springer Nature journal article supplement (doi:10.1007/s13300-016-0177-8), 2016-06-04
Supplement: MOESM1 [file 10242792]

## SUPPLEMENTARY MATERIAL

**Table S1: unmatched sample descriptives**

| Variable                                  | Sulfonylurea | Vildagliptin (Galvus®) |
|-------------------------------------------|--------------|------------------------|
| <b>N</b>                                  | 16321        | 4481                   |
| <b>Age (years)</b>                        |              |                        |
| Mean (SD)                                 | 69.0 (11.2)  | 64.2 (10.8)            |
| Min                                       | 40           | 40                     |
| Max                                       | 103          | 95                     |
| <b>Sex (N,%)</b>                          |              |                        |
| Male                                      | 8346 (51.1%) | 2614 (58.3%)           |
| Female                                    | 7975 (48.9%) | 1867 (41.7%)           |
| <b>Line of therapy</b>                    |              |                        |
| 1 <sup>st</sup> line                      | 7923 (48.5%) | 1269 (28.3%)           |
| 2 <sup>nd</sup> line                      | 6545 (40.1%) | 2056 (45.9%)           |
| 3 <sup>rd</sup> line                      | 1489 (9.1%)  | 875 (19.5%)            |
| 4 <sup>th</sup> or higher line            | 278 (1.7%)   | 223 (4.9%)             |
| <b>HbA1C</b>                              |              |                        |
| N (%) available                           | 11349        | 3258                   |
| Mean, SD                                  | 7.61 (1.48)  | 7.59 (1.46)            |
| Median                                    | 7.3          | 7.3                    |
| Min                                       | 3.1          | 4.6                    |
| Max                                       | 17.7         | 19.0                   |
| <b>Duration of disease (years)</b>        |              |                        |
| Mean, SD                                  | 2.49 (3.46)  | 3.48 (3.75)            |
| Min                                       | 0            | 0                      |
| Max                                       | 20.9         | 20.4                   |
| <b>Duration of treatment (years)</b>      |              |                        |
| Mean, SD                                  | 3.90 (1.97)  | 8.33 (2.75)            |
| Min                                       | 0            | 0                      |
| Max                                       | 61.9         | 67.0                   |
| <b>Previous hypoglycaemic event (N,%)</b> | 83 (0.51%)   | 24 (0.54%)             |

**Table S2: unmatched samples clinical characteristics**

| Characteristic                                 | Sulfonylurea      | Vildagliptin (Galvus®) |
|------------------------------------------------|-------------------|------------------------|
| <b>Co-prescribed medications (N,%)</b>         |                   |                        |
| Antihypertensives (C03, C07, C08, C09)         | 13911 (85.2%)     | 3604 (80.4%)           |
| Lipid modifying agents (C10)                   | 7488 (45.9%)      | 2081 (46.4%)           |
| Other DPP4 (A10N excl Vildagliptin)            | 2950 (18.1%)      | 146 (3.3%)             |
| GLP-1 (A10S)                                   | 460 (2.8%)        | 94 (2.1%)              |
| Metformin (A10J)                               | 10452 (64.0%)     | 3944 (88.0%)           |
| SGLT II (A10P)                                 | 70 (0.4%)         | 73 (1.6%)              |
| Alpha glucosidase inhibitors (A10L)            | 340 (2.1%)        | 41 (0.9%)              |
| Glinids (A10M)                                 | 298 (1.8%)        | 171 (3.8%)             |
| <b>Glitazone (TZD) (A10K)</b>                  | <b>614 (3.8%)</b> | <b>67 (1.5%)</b>       |
| Insulin (A10C)                                 | 2309 (14.1%)      | 470 (10.5%)            |
|                                                |                   |                        |
| <b>Co-morbid conditions (N,%)</b>              |                   |                        |
| Hypertension (I10)                             | 13949 (85.5%)     | 3791 (84.6%)           |
| Peripheral vascular disease (I739, E115, E145) | 2838 (17.4%)      | 582 (13.0%)            |
| Hyperlipidemia (E78)                           | 9428 (57.8%)      | 2724 (60.8%)           |
| Prior stroke (I63,64)                          | 752 (4.6%)        | 153 (3.4%)             |
| Myocardial infarction (I21-23, I252)           | 983 (6.0%)        | 287 (6.4%)             |
| Ischemic heart disease (I24,25)                | 5309 (32.5%)      | 1124 (25.1%)           |
| Angina pectoris (I20)                          | 1368 (8.4%)       | 340 (7.6%)             |
| Heart insufficiency (N18, N19)                 | 2635 (16.1%)      | 596 (13.3%)            |
| Depression (F32, 33)                           | 4112 (25.2%)      | 1041 (23.2%)           |
| Dementia (F01, F03, G30)                       | 1838 (11.3%)      | 204 (4.6%)             |
|                                                |                   |                        |
| Charlson Comorbidity Score                     |                   |                        |
| Mean (SD)                                      | 2.28 (1.58)       | 2.34 (1.67)            |
| Min                                            | 0                 | 0                      |
| Max                                            | 20                | 13                     |

**Table S3: events (unmatched samples)**

| <b>Event</b>                                                 | <b>Sulfonylurea</b> | <b>Vildagliptin (Galvus®)</b> |
|--------------------------------------------------------------|---------------------|-------------------------------|
| <b>Study population</b>                                      | 16321               | 4481                          |
| <b>Retinopathy</b>                                           |                     |                               |
| Patients with no retinopathy prior to index date             | 15962               | 4359                          |
| Retinopathy during all available follow up period (absolute) | 545                 | 87                            |
| Retinopathy during all available follow up period (%)        | 3.4%                | 2.0%                          |
| Time to first retinopathy diagnosis for each group           | 8.57                | 5.12                          |
| <b>Nephropathy</b>                                           |                     |                               |
| Patients with no nephropathy prior to index date             | 15824               | 4291                          |
| Nephropathy during all available follow up period (absolute) | 963                 | 229                           |
| Nephropathy during all available follow up period (%)        | 6.1%                | 5.3%                          |
| Time to first Nephropathy diagnosis for each group           | 9.47                | 5.78                          |
| <b>Neuropathy</b>                                            |                     |                               |
| Patients with no Neuropathy prior to index date              | 14959               | 4014                          |
| Neuropathy during all available follow up period (absolute)  | 2036                | 390                           |
| Neuropathy during all available follow up period (%)         | 13.6%               | 9.7%                          |
| Time to first Neuropathy diagnosis for each group            | 8.42                | 5.07                          |
| <b>Diabetic Foot Syndrome (DFS)</b>                          |                     |                               |
| Patients with no DFS prior to index date                     | 16090               | 4400                          |
| DFS during all available follow up period (absolute)         | 745                 | 127                           |
| DFS during all available follow up period (%)                | 4.6%                | 2.9%                          |
| Time to first DFS diagnosis for each group                   | 9.02                | 6.03                          |
| <b>Combined (any event)</b>                                  |                     |                               |
| Patients with no event prior to index date                   | 14189               | 3749                          |
| Event during all available follow up period (absolute)       | 2963                | 582                           |
| Event during all available follow up period (%)              | 20.9%               | 15.5%                         |
| Time to first event diagnosis for each group                 | 8.28                | 5.13                          |
